# Supplementary material for: Detection and quantification of offal content in ground beef meat using vibrational spectroscopic-based chemometric analysis
Source: PubMed Central journal article supplement (PMC5680338; doi:10.1038/s41598-017-15389-3), 2017-11-09
Supplement: 41598_2017_15389_MOESM1_ESM.pdf [file 41598_2017_15389_MOESM1_ESM.pdf]

**Detection and quantification of offal content in ground beef meat using vibrational spectroscopic-based chemometric analysis**

Yaxi Hu<sup>1</sup>, Liang Zou<sup>2</sup>, Xiaolin Huang<sup>1</sup>, Xiaonan Lu<sup>1\*</sup>

<sup>1</sup>Food, Nutrition and Health Program, Faculty of Land and Food Systems, The University of British Columbia, Vancouver, V6T 1Z4, BC, Canada

<sup>2</sup>Department of Electrical and Computer Engineering, The University of British Columbia, Vancouver, BC, Canada

Corresponding authors: Prof. Xiaonan Lu, [xiaonan.lu@ubc.ca](mailto:xiaonan.lu@ubc.ca);

**Table****Table S1.** The best three models for the 7-class classification of all samples using FT-IR spectra

|                 |           | LDA calibration |             |           | PCA-DA calibration |             |           | PLS-DA calibration |             |           |
|-----------------|-----------|-----------------|-------------|-----------|--------------------|-------------|-----------|--------------------|-------------|-----------|
| class           | # spectra | specificity     | sensitivity | precision | specificity        | sensitivity | precision | specificity        | sensitivity | precision |
| meat            | 40        | 100%            | 100%        | 100%      | 100%               | 93%         | 100%      | 100%               | 97%         | 100%      |
| beef honey comb | 65        | 100%            | 97%         | 100%      | 96%                | 51%         | 70%       | 97%                | 68%         | 80%       |
| beef liver      | 65        | 100%            | 100%        | 100%      | 100%               | 94%         | 100%      | 100%               | 100%        | 100%      |
| beef omasum     | 65        | 99%             | 100%        | 97%       | 92%                | 72%         | 60%       | 96%                | 72%         | 75%       |
| pork heart      | 65        | 99%             | 100%        | 97%       | 98%                | 97%         | 90%       | 96%                | 98%         | 83%       |
| pork kidney     | 65        | 100%            | 97%         | 100%      | 93%                | 95%         | 72%       | 99%                | 92%         | 95%       |
| pork liver      | 65        | 100%            | 100%        | 100%      | 100%               | 77%         | 98%       | 98%                | 95%         | 91%       |
|                 |           | LDA CV          |             |           | PCA-DA CV          |             |           | PLS-CA 10 fold CV  |             |           |
| class           | # spectra | specificity     | sensitivity | precision | specificity        | sensitivity | precision | specificity        | sensitivity | precision |
| meat            | 40        | 100%            | 100%        | 100%      | 100%               | 93%         | 100%      | 100%               | 93%         | 100%      |
| beef honey comb | 65        | 97%             | 74%         | 81%       | 96%                | 48%         | 69%       | 97%                | 62%         | 78%       |
| beef liver      | 65        | 100%            | 97%         | 100%      | 100%               | 94%         | 100%      | 100%               | 100%        | 100%      |
| beef omasum     | 65        | 96%             | 83%         | 77%       | 91%                | 74%         | 59%       | 95%                | 69%         | 70%       |
| pork heart      | 65        | 99%             | 96%         | 93%       | 98%                | 94%         | 90%       | 95%                | 98%         | 79%       |
| pork kidney     | 65        | 99%             | 94%         | 92%       | 93%                | 95%         | 72%       | 99%                | 92%         | 92%       |
| pork liver      | 65        | 99%             | 95%         | 96%       | 99%                | 75%         | 94%       | 98%                | 94%         | 91%       |
|                 |           | LDA prediction  |             |           | PCA-DA prediction  |             |           | PLS-DA prediction  |             |           |
| class           | # spectra | specificity     | sensitivity | precision | specificity        | sensitivity | precision | specificity        | sensitivity | precision |
| meat            | 15        | 100%            | 100%        | 100%      | 100%               | 93%         | 100%      | 100%               | 60%         | 90%       |
| beef honey comb | 35        | 91%             | 77%         | 60%       | 92%                | 80%         | 64%       | 94%                | 57%         | 65%       |
| beef liver      | 35        | 100%            | 100%        | 100%      | 100%               | 100%        | 100%      | 100%               | 100%        | 100%      |
| beef omasum     | 35        | 95%             | 54%         | 66%       | 96%                | 66%         | 74%       | 92%                | 71%         | 63%       |
| pork heart      | 35        | 98%             | 71%         | 89%       | 97%                | 83%         | 83%       | 96%                | 94%         | 82%       |
| pork kidney     | 35        | 95%             | 86%         | 75%       | 96%                | 80%         | 80%       | 96%                | 86%         | 79%       |
| pork liver      | 35        | 98%             | 86%         | 91%       | 99%                | 86%         | 97%       | 99%                | 86%         | 97%       |

**Table S2.** The best three models for the 3-class classification of all samples using FT-IR spectra

|            |           | LDA calibration |             |           | PCA-DA calibration |             |           | PLS-DA calibration |             |           |
|------------|-----------|-----------------|-------------|-----------|--------------------|-------------|-----------|--------------------|-------------|-----------|
| class      | # spectra | specificity     | sensitivity | precision | specificity        | sensitivity | precision | specificity        | sensitivity | precision |
| beef meat  | 40        | 100%            | 100%        | 100%      | 100%               | 93%         | 100%      | 99%                | 100%        | 91%       |
| beef offal | 195       | 100%            | 97%         | 100%      | 97%                | 89%         | 96%       | 99%                | 96%         | 98%       |
| pork offal | 195       | 98%             | 100%        | 97%       | 91%                | 100%        | 90%       | 96%                | 99%         | 96%       |
|            |           | LDA 10-fold CV  |             |           | PCA-DA 10-fold CV  |             |           | PLS-DA 10-fold CV  |             |           |
| class      | # spectra | specificity     | sensitivity | precision | specificity        | sensitivity | precision | specificity        | sensitivity | precision |
| beef meat  | 40        | 100%            | 100%        | 100%      | 100%               | 93%         | 100%      | 100%               | 93%         | 100%      |
| beef offal | 195       | 98%             | 94%         | 98%       | 97%                | 88%         | 96%       | 98%                | 95%         | 98%       |
| pork offal | 195       | 95%             | 98%         | 95%       | 89%                | 96%         | 88%       | 96%                | 99%         | 95%       |
|            |           | LDA prediction  |             |           | PCA-DA prediction  |             |           | PLS-DA prediction  |             |           |
| class      | # spectra | specificity     | sensitivity | precision | specificity        | sensitivity | precision | specificity        | sensitivity | precision |
| beef meat  | 15        | 100%            | 100%        | 100%      | 100%               | 80%         | 100%      | 96%                | 93%         | 61%       |
| beef offal | 105       | 92%             | 96%         | 91%       | 95%                | 90%         | 94%       | 96%                | 91%         | 95%       |
| pork offal | 105       | 97%             | 90%         | 96%       | 91%                | 96%         | 90%       | 94%                | 90%         | 93%       |

**Table S3.** The optimized models for the 2-class classification of beef and pork offal using FT-IR spectra

| SIMCA model for 2-class beef offal using FT-IR spectra |             |             |           |                                         |             |           |                                         |             |           |
|--------------------------------------------------------|-------------|-------------|-----------|-----------------------------------------|-------------|-----------|-----------------------------------------|-------------|-----------|
| calibration: error rate 0, accuracy 100%               |             |             |           | 10-fold CV: error rate 1%, accuracy 99% |             |           | Prediction: error rate 0, accuracy 100% |             |           |
| class                                                  | specificity | sensitivity | precision | specificity                             | sensitivity | precision | specificity                             | sensitivity | precision |
| beef stomach                                           | 100%        | 100%        | 100%      | 98%                                     | 100%        | 99%       | 100%                                    | 100%        | 100%      |
| beef liver                                             | 100%        | 100%        | 100%      | 100%                                    | 98%         | 100%      | 100%                                    | 100%        | 100%      |

  

| LDA model for 2-class pork offal using FT-IR spectra |             |             |           |                                         |             |           |                                         |             |           |
|------------------------------------------------------|-------------|-------------|-----------|-----------------------------------------|-------------|-----------|-----------------------------------------|-------------|-----------|
| calibration: error rate 0, accuracy 100%             |             |             |           | 10-fold CV: error rate 3%, accuracy 97% |             |           | Prediction: error rate 9%, accuracy 92% |             |           |
| class                                                | specificity | sensitivity | precision | specificity                             | sensitivity | precision | specificity                             | sensitivity | precision |
| pork heart & kidney                                  | 100%        | 100%        | 100%      | 97%                                     | 98%         | 98%       | 86%                                     | 96%         | 93%       |
| pork liver                                           | 100%        | 100%        | 100%      | 98%                                     | 97%         | 95%       | 96%                                     | 86%         | 91%       |

# of spectra in beef stomach and pork heart & kidney group calibration and 10-fold CV is 130, while in prediction is 70. # of spectra in beef liver and pork liver calibration and 10-fold CV is 65, while in prediction is 35.

**Figure**

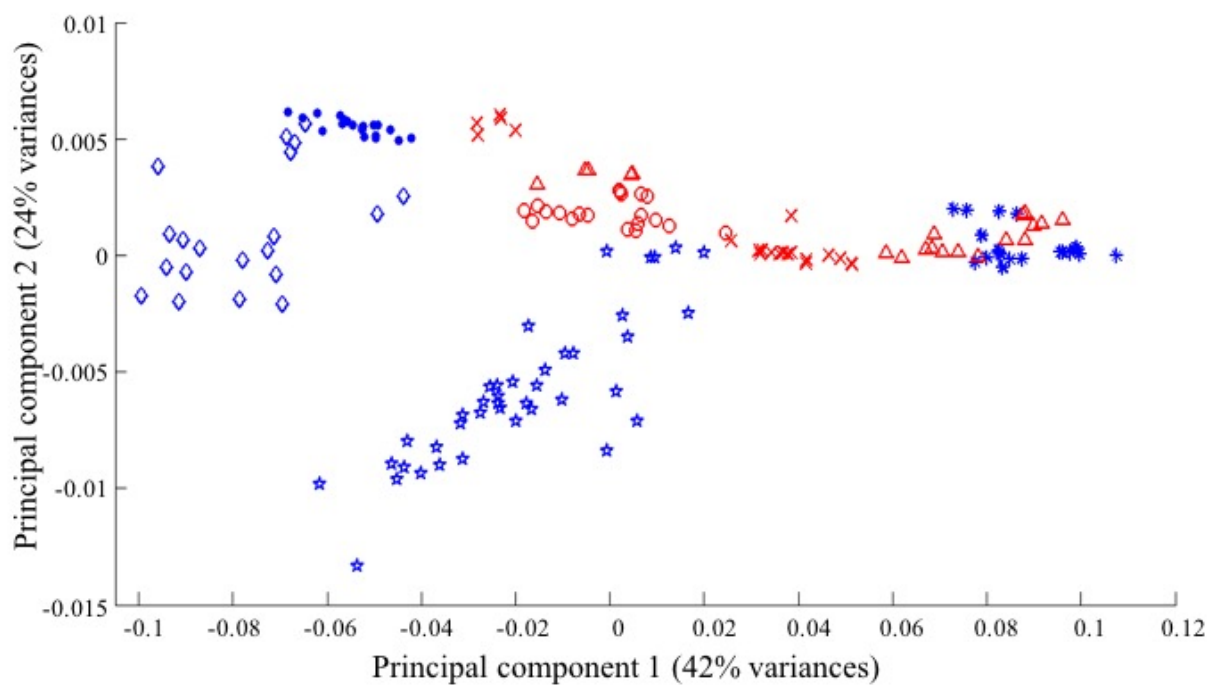

**Fig. S1.** Score plots of principal component analysis of 2<sup>nd</sup> derivative FT-IR spectra. Each symbol represents one type of the sample: star, beef meat; diamond, beef honey comb tripe; cross-mark, beef liver; circle, beef omasum; triangular, pork heart; dot, pork kidney; asteroid, pork liver.

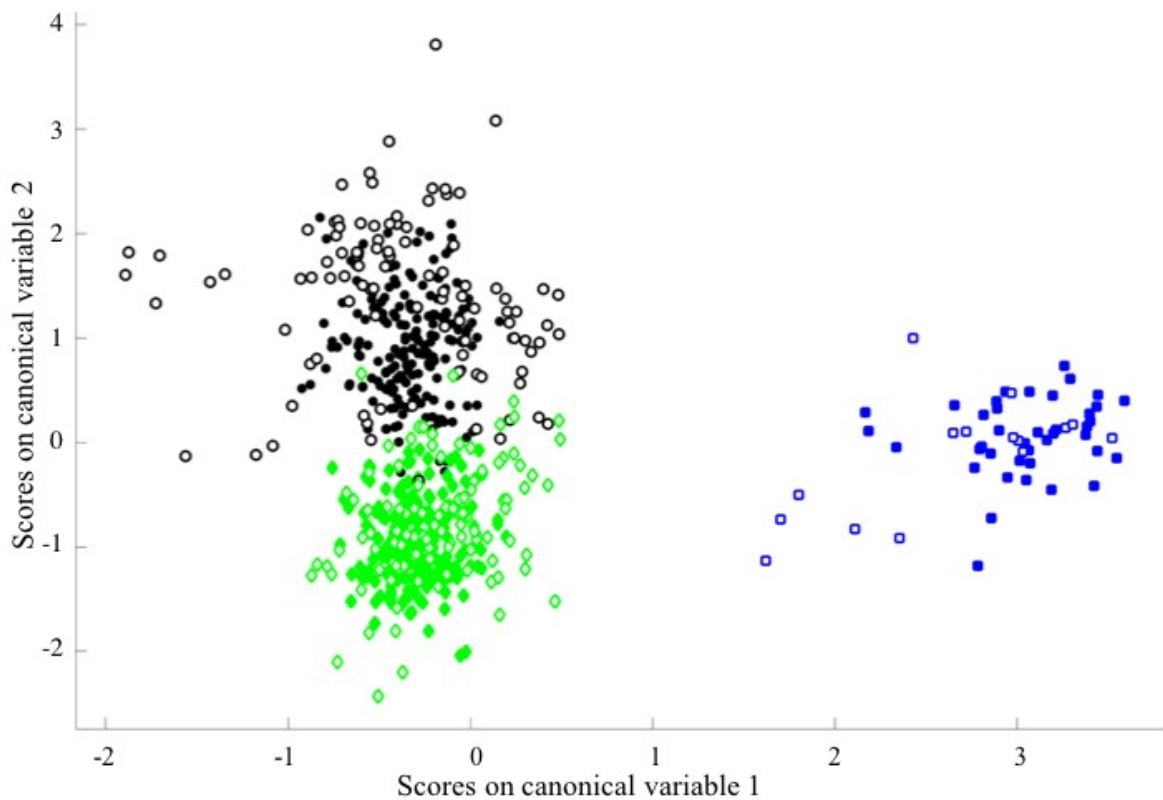

**Fig. S2.** Score plot of LDA model for 3-class classification of all samples. Solid blue squares, black circles, and green diamonds represent beef meat, beef meat with beef offal and beef meat with pork offal in calibration dataset, respectively. Hollow blue squares, black circles, and green diamonds represent beef meat, beef meat with beef offal and beef meat with pork offal in prediction dataset, respectively.

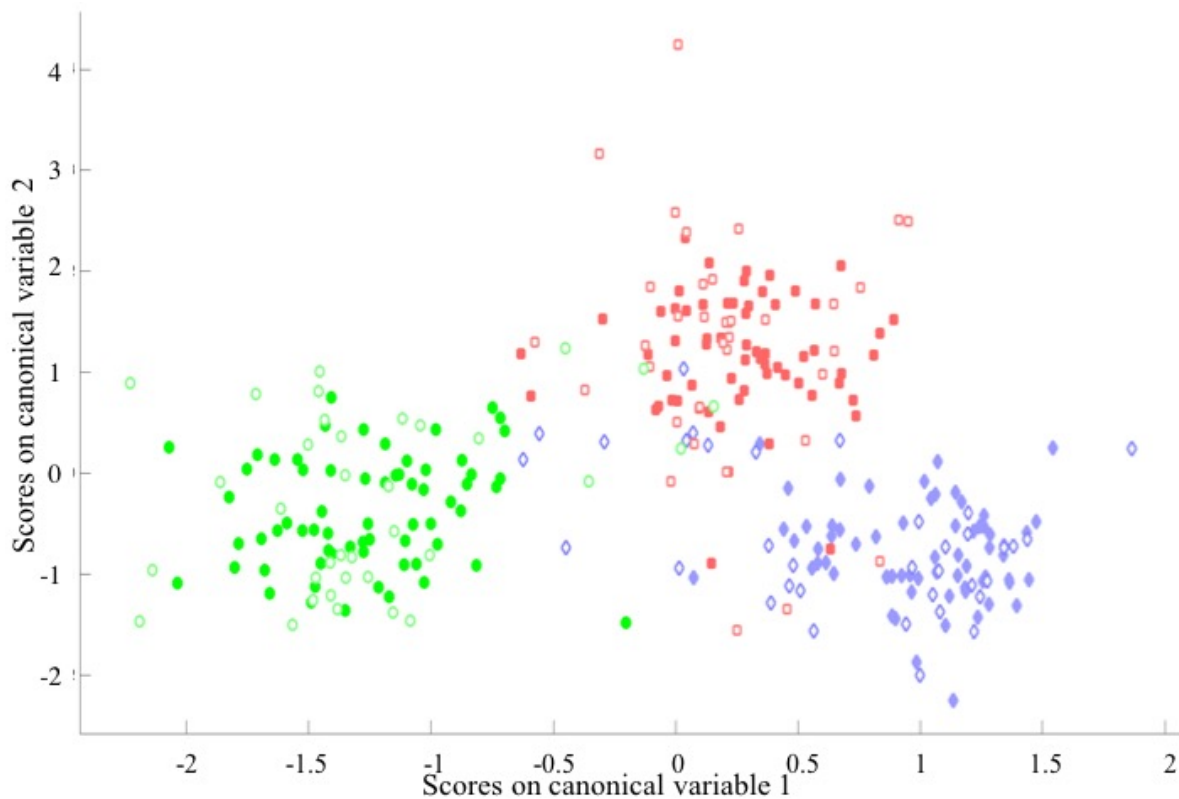

**Fig. S3.** Score plot of LDA model for 3-class classification of pork offal. Solid purple diamonds, red squares and green circles represent beef meat with pork heart, with pork kidney and with pork liver in calibration dataset. Hollow purple diamonds, red squares and green circles represent beef meat with pork heart, with pork kidney and with pork liver in prediction dataset.

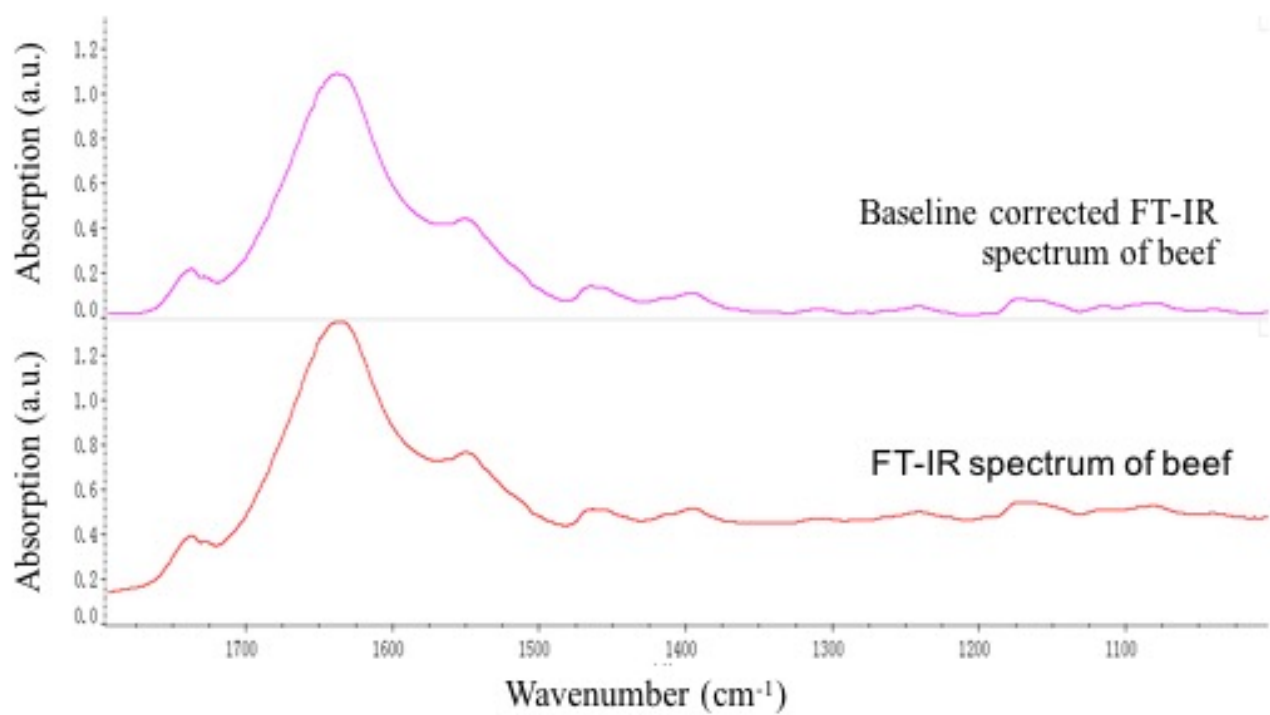

**Fig. S4.** Representative FT-IR (B) spectra of beef meat before and after spectral preprocessing.
